# Supplementary material for: Single-cell spatial transcriptomics reveals a dystrophic trajectory following a developmental bifurcation of myoblast cell fates in facioscapulohumeral muscular dystrophy
Source: HighWire-hosted journal article supplement (doi:10.1101/gr.278717.123), 2024-05-01
Supplement: Supplemental_table_S1.xlsx [file Supplemental_table_S1.xlsx]

## Sheet: Sheet1 (3)
Supplemental Table S1. All genes examined in the study. Whether a gene belong to DUX4 target gene group, as well as whether they are included in WGCNA analysis, are included in the table
No.	Gene	Ensembl	DUX4 target gene	WGCNA analysis
1	CCNA1	ENSG00000133101	Yes	Yes
2	DUXA	ENSG00000258873	Yes	Yes
3	DUXB	ENSG00000282757	Yes	Yes
4	KDM4E	ENSG00000235268	Yes	Yes
5	KHDC1L	ENSG00000256980	Yes	Yes
6	LEUTX	ENSG00000213921	Yes	Yes
7	PRAMEF12	ENSG00000116726	Yes	Yes
8	PRAMEF19	ENSG00000204480	Yes	Yes
9	PRAMEF20	ENSG00000204478	Yes	Yes
10	RBP7	ENSG00000162444	Yes	No
11	RFPL1	ENSG00000128250	Yes	No
12	RFPL2	ENSG00000128253	Yes	Yes
13	RFPL4B	ENSG00000251258	Yes	Yes
14	H3.Y	ENSG00000269466	Yes	Yes
15	TAF11L11	ENSG00000283740	Yes	Yes
16	SLC34A2	ENSG00000157765	Yes	Yes
17	ZNF296	ENSG00000170684	Yes	Yes
18	ZNF596	ENSG00000172748	Yes	No
19	ZSCAN4	ENSG00000180532	Yes	Yes
20	KLF17	ENSG00000171872	Yes	Yes
21	ZNF280A	ENSG00000169548	Yes	No
22	ZNF705G	ENSG00000215372	Yes	Yes
23	SLC38A1	ENSG00000111371	Yes	Yes
24	VMO1	ENSG00000182853	Yes	Yes
25	CCL2	ENSG00000108691	No	No
26	CD70	ENSG00000125726	No	No
27	IFITM1	ENSG00000185885	No	No
28	IFITM2	ENSG00000185201	No	No
29	HYOU1	ENSG00000149428	No	Yes
30	HSPA6	ENSG00000173110	No	No
31	HSPA5	ENSG00000044574	No	Yes
32	ATF6B	ENSG00000213676	No	Yes
33	XBP1	ENSG00000100219	No	Yes
34	EIF2AK3	ENSG00000172071	No	No
35	BAX	ENSG00000087088	No	Yes
36	FAS	ENSG00000026103	No	No
37	BAK1	ENSG00000030110	No	Yes
38	FADD	ENSG00000168040	No	No
39	CITED2	ENSG00000164442	No	Yes
40	ANKLE2	ENSG00000176915	No	Yes
41	NKX2-5	ENSG00000183072	No	No
42	MSC	ENSG00000178860	No	Yes
43	BMP4	ENSG00000125378	No	Yes
44	SOX4	ENSG00000124766	No	Yes
45	TWIST1	ENSG00000122691	No	No
46	NOG	ENSG00000183691	No	No
47	HOXA11	ENSG00000005073	No	No
48	COL5A2	ENSG00000204262	No	Yes
49	COL5A1	ENSG00000130635	No	Yes
50	COL8A1	ENSG00000144810	No	Yes
51	COL18A1	ENSG00000182871	No	Yes
52	COL4A1	ENSG00000187498	No	Yes
53	COL4A2	ENSG00000134871	No	Yes
54	COL5A3	ENSG00000080573	No	Yes
55	COL6A1	ENSG00000142156	No	Yes
56	COL6A2	ENSG00000142173	No	Yes
57	LOX	ENSG00000113083	No	No
58	MYL2	ENSG00000111245	No	No
59	MYH8	ENSG00000133020	No	Yes
60	ACTN2	ENSG00000077522	No	Yes
61	ACTA1	ENSG00000143632	No	Yes
62	TCAP	ENSG00000173991	No	No
63	MYH7	ENSG00000092054	No	Yes
64	MYH3	ENSG00000109063	No	Yes
65	MYOG	ENSG00000122180	No	Yes
66	MYL3	ENSG00000160808	No	No
67	TNNI2	ENSG00000130598	No	Yes
68	MYH6	ENSG00000197616	No	No
69	MYOM3	ENSG00000142661	No	Yes
70	TTN	ENSG00000155657	No	Yes
71	MYMX	ENSG00000262179	No	Yes
72	DUXAP8	ENSG00000206195	No	No
73	CXCL1	ENSG00000163739	No	No
74	CCNB1	ENSG00000134057	No	Yes
75	BEX1	ENSG00000133169	No	No
76	MFAP4	ENSG00000166482	No	No
77	MYDGF	ENSG00000074842	No	Yes
78	IFIT3	ENSG00000119917	No	No
79	SOX9	ENSG00000125398	No	Yes
80	PTX3	ENSG00000163661	No	No
81	SERPINE2	ENSG00000135919	No	Yes
82	SMCHD1	ENSG00000101596	No	Yes
83	DNMT1	ENSG00000130816	No	No
84	DNMT3B	ENSG00000088305	No	No
85	CDK1	ENSG00000170312	No	No
86	ADAM15	ENSG00000143537	No	No
87	ADAM19	ENSG00000135074	No	Yes
88	BGN	ENSG00000182492	No	No
89	BMP1	ENSG00000168487	No	Yes
90	CASQ2	ENSG00000118729	No	Yes
91	CCND2	ENSG00000118971	No	No
92	CCNL1	ENSG00000163660	No	Yes
93	DBET	ENSG00000281591	No	No
94	DCTN1	ENSG00000204843	No	Yes
95	FN1	ENSG00000115414	No	Yes
96	GDF15	ENSG00000130513	No	Yes
97	GREM1	ENSG00000166923	No	Yes
98	GSN	ENSG00000148180	No	Yes
99	HSPB8	ENSG00000152137	No	Yes
100	IGFBP3	ENSG00000146674	No	Yes
101	ITGA10	ENSG00000143127	No	Yes
102	ITGA11	ENSG00000137809	No	Yes
103	KLHL41	ENSG00000239474	No	Yes
104	LAMA5	ENSG00000130702	No	Yes
105	LAMB1	ENSG00000091136	No	Yes
106	LAMB2	ENSG00000172037	No	Yes
107	LAMC1	ENSG00000135862	No	Yes
108	LMOD2	ENSG00000170807	No	Yes
109	LOXL1	ENSG00000129038	No	Yes
110	LOXL2	ENSG00000134013	No	Yes
111	LOXL3	ENSG00000115318	No	No
112	LRATD1	ENSG00000162981	No	Yes
113	LRIF1	ENSG00000121931	No	Yes
114	MEF2C	ENSG00000081189	No	Yes
115	MMP14	ENSG00000157227	No	Yes
116	MMP19	ENSG00000123342	No	No
117	MMP2	ENSG00000087245	No	Yes
118	MTCH1	ENSG00000137409	No	No
119	NCOA3	ENSG00000124151	No	Yes
120	NEB	ENSG00000183091	No	Yes
121	PCOLCE	ENSG00000106333	No	No
122	PDGFA	ENSG00000197461	No	Yes
123	PNRC2	ENSG00000189266	No	Yes
124	PRR15	ENSG00000176532	No	No
125	PRR32	ENSG00000183631	No	No
126	PTAR1	ENSG00000188647	No	Yes
127	RBBP6	ENSG00000122257	No	Yes
128	RPN2	ENSG00000118705	No	Yes
129	SEC31A	ENSG00000138674	No	Yes
130	SERPINE1	ENSG00000106366	No	Yes
131	SLC14A1	ENSG00000141469	No	No
132	SLC9A3R2	ENSG00000065054	No	No
133	SMPX	ENSG00000091482	No	Yes
134	TGFB1	ENSG00000105329	No	Yes
135	TGFBR1	ENSG00000106799	No	Yes
136	TIMP3	ENSG00000100234	No	Yes
137	TRIM72	ENSG00000177238	No	Yes
138	WFS1	ENSG00000109501	No	No
139	WIPI1	ENSG00000070540	No	Yes
140	YIF1A	ENSG00000174851	No	Yes
