# Supplementary material for: Single-cell spatial transcriptomics reveals a dystrophic trajectory following a developmental bifurcation of myoblast cell fates in facioscapulohumeral muscular dystrophy
Source: HighWire-hosted journal article supplement (doi:10.1101/gr.278717.123), 2024-05-01
Supplement: Supplemental_table_S2.xlsx [file Supplemental_table_S2.xlsx]

## Sheet: modules
Supplemental Table S2. Gene assignment to each detected co-expression module. In each column, module assignments are represented as their corresponding colors in the figures.
gene	Control modules	FSHD modules	DEL5 modules
HYOU1	blue	grey	grey
HSPA5	blue	grey	grey
ATF6B	turquoise	skyblue	greenyellow
XBP1	blue	grey	grey
BAX	turquoise	skyblue	grey
BAK1	turquoise	skyblue	greenyellow
CITED2	blue	pastel orange	grey
ANKLE2	blue	skyblue	greenyellow
MSC	turquoise	pastel orange	dark violet
BMP4	grey	grey	purple
SOX4	turquoise	pastel orange	dark orange
COL5A2	turquoise	pastel orange	dark violet
COL5A1	turquoise	pastel orange	dark violet
COL8A1	turquoise	pastel orange	dark violet
COL18A1	turquoise	pastel orange	dark violet
COL4A1	turquoise	pastel orange	dark violet
COL4A2	turquoise	pastel orange	dark violet
COL5A3	turquoise	pastel orange	dark violet
COL6A1	turquoise	grey	dark violet
COL6A2	turquoise	pastel orange	dark violet
MYH8	brown	red	dark orange
ACTN2	brown	yellow	dark orange
ACTA1	brown	yellow	grey
MYH7	grey	yellow	grey
MYH3	grey	yellow	dark orange
MYOG	brown	red	grey
TNNI2	brown	yellow	dark orange
MYOM3	brown	red	dark orange
TTN	grey	grey	greenyellow
MYMX	brown	red	grey
CCNB1	grey	skyblue	purple
MYDGF	blue	skyblue	purple
SOX9	turquoise	grey	grey
SERPINE2	turquoise	skyblue	purple
SMCHD1	turquoise	skyblue	purple
ADAM19	turquoise	grey	greenyellow
BMP1	turquoise	pastel orange	dark violet
CASQ2	grey	yellow	dark orange
CCNL1	blue	skyblue	purple
DCTN1	blue	skyblue	dark orange
FN1	turquoise	pastel orange	dark violet
GDF15	turquoise	pastel orange	grey
GREM1	turquoise	pastel orange	dark violet
GSN	brown	grey	dark orange
HSPB8	grey	yellow	dark orange
IGFBP3	turquoise	grey	grey
ITGA10	turquoise	grey	grey
ITGA11	turquoise	pastel orange	dark violet
KLHL41	brown	grey	dark orange
LAMA5	brown	red	dark orange
LAMB1	turquoise	pastel orange	grey
LAMB2	blue	pastel orange	dark orange
LAMC1	turquoise	pastel orange	dark violet
LMOD2	grey	yellow	dark orange
LOXL1	turquoise	pastel orange	dark violet
LOXL2	turquoise	pastel orange	grey
LRATD1	blue	grey	dark orange
LRIF1	blue	skyblue	grey
MEF2C	grey	red	dark orange
MMP14	turquoise	pastel orange	dark violet
MMP2	turquoise	pastel orange	grey
NCOA3	blue	skyblue	purple
NEB	brown	red	dark orange
PDGFA	blue	grey	greenyellow
PNRC2	turquoise	skyblue	purple
PTAR1	grey	skyblue	purple
RBBP6	blue	skyblue	purple
RPN2	blue	skyblue	purple
SEC31A	blue	skyblue	dark orange
SERPINE1	turquoise	pastel orange	grey
SMPX	grey	grey	greenyellow
TGFB1	turquoise	pastel orange	dark orange
TGFBR1	turquoise	pastel orange	dark violet
TIMP3	grey	grey	grey
TRIM72	brown	red	dark orange
WIPI1	blue	grey	dark orange
YIF1A	blue	skyblue	greenyellow
